# Supplementary material for: Remote Ischemic Conditioning After Stroke Trial 2: A Phase IIb Randomized Controlled Trial in Hyperacute Stroke
Source: PubMed Central journal article supplement — J Am Heart Assoc. 2019 Nov 21;8(23):e013572. doi: 10.1161/JAHA.119.013572 (PMC6912955; doi:10.1161/jaha.119.013572), 2019-11-21
Supplement: JAH3-8-e013572-s001.pdf [file JAH3-8-e013572-s001.pdf]

# **SUPPLEMENTAL MATERIAL**

**Table S1. Reasons for exclusion from centre 1.**

| <b>Reason for exclusion</b>                                             | <b>N = 1387</b> | <b>(%)</b> |
|-------------------------------------------------------------------------|-----------------|------------|
| Greater than 6 hours since onset of symptoms                            | 575             | 41.5       |
| Premorbid dependency mRS $\geq$ 4                                       | 12              | 0.9        |
| Dementia                                                                | 34              | 2.5        |
| Coma – GCS <8                                                           | 3               | 0.2        |
| Malignancy or significant co-morbidity thought to limit life expectancy | 12              | 0.9        |
| Blood glucose < 3.5mmol/L                                               | 0               | 0.0        |
| Pregnancy                                                               | 0               | 0.0        |
| Out of hours                                                            | 186             | 13.4       |
| Non stroke                                                              | 174             | 12.5       |
| No-one to assent                                                        | 8               | 0.6        |
| Trial on hold                                                           | 9               | 0.6        |
| Poor prognosis/ Died                                                    | 11              | 0.8        |
| Recruited                                                               | 20              | 1.4        |
| Refused                                                                 | 7               | 0.5        |
| Out of area                                                             | 1               | 0.1        |
| No English                                                              | 2               | 0.1        |
| Competing trial                                                         | 13              | 0.9        |
| Anaphylactic reaction to thrombolysis                                   | 2               | 0.1        |
| Resolved minor stroke                                                   | 8               | 0.6        |

|                                                                  |     |      |
|------------------------------------------------------------------|-----|------|
| TIA                                                              | 119 | 8.6  |
| ICH                                                              | 170 | 12.3 |
| Thrombectomy                                                     | 3   | 0.2  |
| Seizures/ vomiting at presentation                               | 1   | 0.1  |
| Researcher unavailable (e.g. annual leave, training, sick leave) | 17  | 1.2  |

(Data not available from centre 2, which were discarded before analysis due to changes in European law on data protection (General Data Protection Regulation (GDPR), see <https://eugdpr.org>).

**Table S2. Reasons for non-compliance.**

---

| <b>RIC group</b> |                                                                                                                 |
|------------------|-----------------------------------------------------------------------------------------------------------------|
| Dose 1           | n=1 refused all cycles <sup>†</sup>                                                                             |
| Dose 2           | n=1 refused all cycles <sup>†</sup> , n=4 reduced compliance (1=cuff pressure, 1=headache, 2=cannula)           |
| Dose 3           | n=1 weekend (no researcher available to administer intervention), n=1 relative refusal, n=1 cuff pressure       |
| Dose 4           | n=1 agitated, refused remaining doses; n=1 weekend; n=1 relative refused remaining doses; n=1 cuff pressure     |
| Dose 5           | n=2 weekend, n=1 relative refusal, n=1 felt unwell on cuff release, remainder discharged                        |
| Dose 6           | n=2 weekend, n=1 refused (previously felt unwell with cuff release), n=1 relative refused, remainder discharged |
| Dose 7           | n=1 refusal, n=1 relative refusal, remainder discharged                                                         |
| Dose 8           | n=1 refusal, n=1 relative refusal, remainder discharged                                                         |

---

| <b>Sham</b> |                                                                                             |
|-------------|---------------------------------------------------------------------------------------------|
| Dose 2      | n=1 deteriorated during treatment, n=1 relative refused all doses after dose 1, n=1 weekend |
| Doses 3&4   | n=1 weekend (no researcher available to administer intervention)                            |

---

† one participant refused doses 1 and 2 but was fully compliant doses 3-8  
Early discharge explains the remainder of non-compliance in the sham group

---

**Table S3. Serious adverse events.**

| Treatment Group | Trial number | Thrombo-lysis | Time post randomisation (days d, hours hr, minutes m) | Adjudicated Diagnosis                               | Day of death | Relationship |
|-----------------|--------------|---------------|-------------------------------------------------------|-----------------------------------------------------|--------------|--------------|
| Sham            | 11           | Y             | 0 d, 5 hr, 58 m                                       | Extension/recurrent ischaemic stroke                | 3            | Improbable   |
|                 | 11           | Y             | 0 d, 6 hr, 33 m                                       | Pneumonia                                           |              | Improbable   |
|                 | 13           | N             | 0 d, 15 hr, 7 m                                       | Extension/recurrent ischaemic stroke                |              | Improbable   |
|                 | 13           | N             | 0 d, 0 hr, 2 m                                        | Haematemesis                                        |              | Improbable   |
|                 | 13           | N             | 3 d, 12 hr, 17 m                                      | Pulmonary embolism                                  |              | Improbable   |
|                 | 15           | N             | 0 d, 9 hr, 54 m                                       | Extension/recurrent ischaemic stroke                |              | Improbable   |
|                 | 23           | N             | 0 d, 0 hr, 36 m                                       | Extension/recurrent ischaemic stroke                |              | Improbable   |
|                 | 23           | N             | 1 d, 21 hr, 56 m                                      | Symptomatic Haemorrhagic transformation of infarct  | 6            | Possible     |
|                 | 28           | Y             | 0 d, 3 hr, 29 m                                       | Seizure / convulsions                               |              | Improbable   |
|                 | 28           | Y             | 0 d, 0 hr, 1 m                                        | Early neurological deterioration                    | 4            | Improbable   |
|                 |              | Y             | 0 d, 22 hr, 19 m                                      | Asymptomatic Haemorrhagic transformation of infarct |              | Possible     |
|                 | 41           | Y             | 1 d, 22 hr, 20 m                                      | Pneumonia                                           |              | Improbable   |
|                 | 38           | N             | 15 d, 22 hr, 39 m                                     | Traumatic rectus sheath haematoma                   |              | Improbable   |
|                 | 38           | N             | 6 d, 0 hr, 30 m                                       | Urinary tract infection                             |              | Improbable   |
|                 | 41           | Y             | 12 d, 23 hr, 11 m                                     | Pneumonia                                           |              | Improbable   |
|                 | 41           | Y             | 31 d, 1 hr, 35 m                                      | Urinary tract infection                             |              | Improbable   |
|                 | 41           | Y             | 36 d, 19 hr, 35 m                                     | Complication of original stroke                     | 47           | Improbable   |
|                 | 47           | Y             | 0 d, 2 hr, 25 m                                       | Extension/recurrent ischaemic stroke                |              | Improbable   |

|            |    |   |                   |                                                    |    |            |
|------------|----|---|-------------------|----------------------------------------------------|----|------------|
|            | 53 | Y | 0 d, 5 hr, 46 m   | Extension/recurrent ischaemic stroke               |    | Improbable |
| <b>RIC</b> | 9  | Y | 0 d, 21 hr, 7 m   | Extension/recurrent ischaemic stroke               |    | Improbable |
|            | 12 | Y | 0 d, 17 hr, 32 m  | Symptomatic Haemorrhagic transformation of infarct | 2  | Possible   |
|            | 16 | N | 2 d, 6 hr, 40 m   | Urinary tract infection                            |    | Improbable |
|            | 22 | Y | 0 d, 0 hr, 0 m    | Fever, undetermined source                         |    | Improbable |
|            | 39 | N | 7 d, 10 hr, 10 m  | Symptomatic Haemorrhagic transformation of infarct |    | Possible   |
|            | 39 | N | 1 d, 22 hr, 6 m   | Lung Malignancy                                    | 30 | Improbable |
|            | 39 | N | 21 d, 10 hr, 10 m | Recurrent ischaemic stroke                         |    | Improbable |
|            | 33 | N | 17 d, 17 hr, 55 m | Pneumonia                                          |    | Improbable |
|            | 42 | Y | 2 d, 7 hr, 37 m   | Urinary tract infection                            |    | Improbable |
|            | 35 | Y | 9 d, 20 hr, 5 m   | Urinary tract infection                            |    | Improbable |
|            | 52 | N | 2 d, 23 hr, 23 m  | Transient ischaemic attack                         |    | Improbable |
|            | 44 | N | 6 d, 19 hr, 55 m  | Pneumonia                                          |    | Improbable |

---

**Table S4. Serious Adverse Events and Clinical outcomes by thrombolysis.**

| <b>Serious Adverse Event</b>         | <b>RIC</b> | <b>Sham</b> | <b>p</b> |
|--------------------------------------|------------|-------------|----------|
| <b>Thrombolysed</b>                  |            |             |          |
| Number                               | 16         | 17          |          |
| No with SAE                          |            |             |          |
| Any SAE                              | 5 (31.3)   | 5 (29.4)    | 1.0      |
| Fatal                                | 1 (6.2)    | 3 (17.6)    | 0.60     |
| All stroke and ND*                   |            |             |          |
| Extension/recurrent ischaemic stroke | 1 (6.2)    | 3 (17.6)    | 0.60     |
| Symptomatic HTI                      | 1 (6.2)    | 0           | 0.49     |
| Early ND                             | 0          | 1 (5.9)     | 1.0      |
| Seizure                              | 0          | 1 (5.9)     | 1.0      |
| Limb injury                          | 0          | 0           | -        |
| <b>Not thrombolysed</b>              |            |             |          |
| Number                               | 15         | 12          |          |
| No with SAE                          |            |             |          |
| Any SAE                              | 5 (33.3)   | 5 (41.7)    | 1.0      |

|                                      |         |         |      |
|--------------------------------------|---------|---------|------|
| Fatal                                | 1 (6.7) | 1 (8.3) | 1.0  |
| All stroke and ND*                   |         |         |      |
| Extension/recurrent ischaemic stroke | 1 (6.7) | 3 (25)  | 0.29 |
| Symptomatic HTI                      | 1 (6.7) | 1 (8.3) | 1.0  |
| Early ND                             | 0       | 0       | -    |
| Seizure                              | 0       | 0       | -    |
| Limb injury                          | 0       | 0       | -    |

---

Post hoc analyses, performed using 2-sided Fisher's Exact test. Data are number (%)

SAE, serious adverse event, ND neurological deterioration, HTI haemorrhagic transformation of infarction
